# Supplementary material for: Are cities hotspots for bees? Local and regional diversity patterns lead to different conclusions
Source: Springer Nature journal article supplement (doi:10.1007/s11252-020-00972-w), 2020-03-12
Supplement: MOESM1 [file 17795050]

**Are cities hotspots for bees? Local and regional diversity patterns lead to different conclusions**

**Urban Ecosystems**

Weronika Banaszak-Cibicka<sup>1</sup>, Michał Żmihorski<sup>2, 3</sup>

<sup>1</sup> Institute of Zoology, Poznań University of Life Sciences, Wojska Polskiego 71C, 60-625  
Poznań, Poland; Tel: +48/61/848-7637, Fax: +48/61/848-7632, e-mail:

banaszak@up.poznan.pl

<sup>2</sup> Mammal Research Institute, Polish Academy of Sciences, Stoczek 1, 17-230 Białowieża,  
Poland

<sup>3</sup> Institute of Nature Conservation, Polish Academy of Sciences, Mickiewicza 33, 31-120  
Kraków, Poland

Corresponding author: Weronika Banaszak-Cibicka, Institute of Zoology, Poznań University of Life Sciences, Wojska Polskiego 71C, 60-625 Poznań, Poland e-mail: banaszak@up.poznan.pl, tel: ++ 48 61 8487637

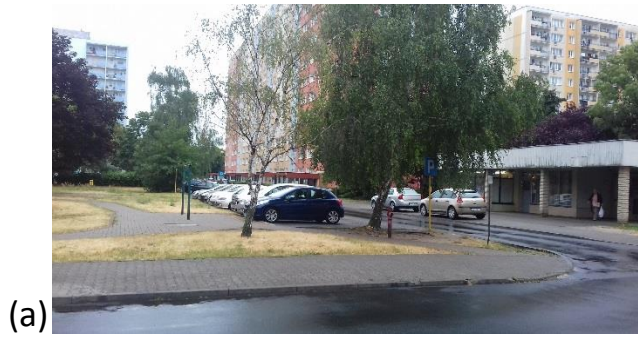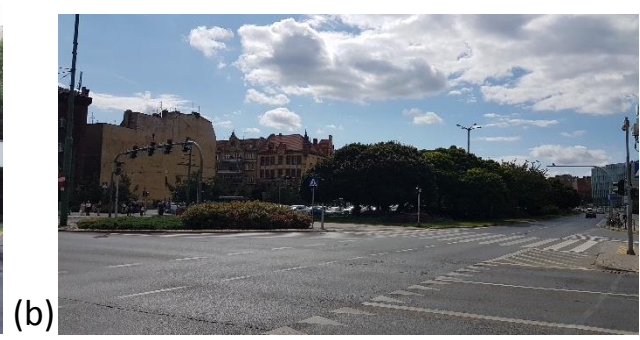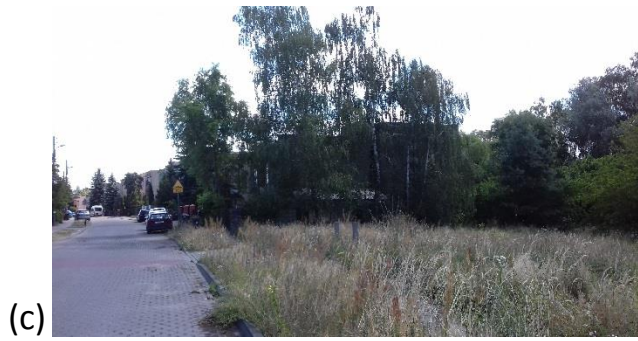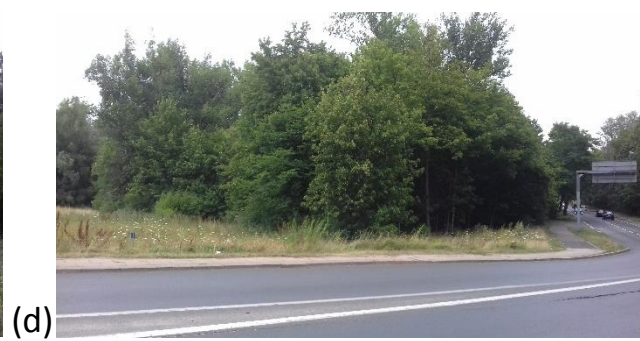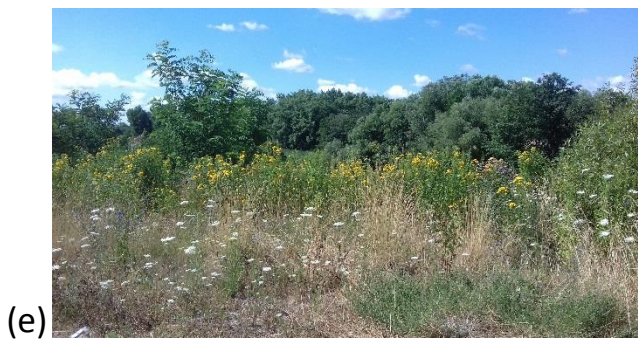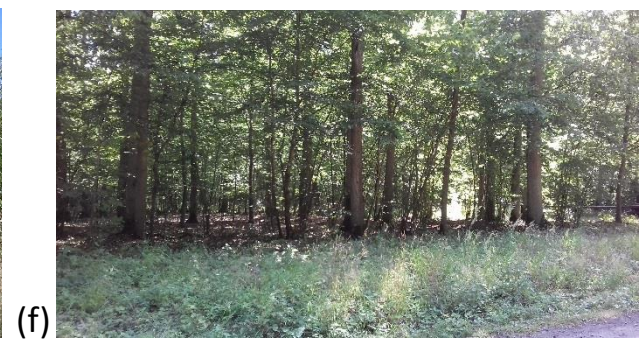

Fig. Research sites: urban (a, b), suburban (c, d) and rural (e, f).
