# Supplementary material for: Are cities hotspots for bees? Local and regional diversity patterns lead to different conclusions
Source: Springer Nature journal article supplement (doi:10.1007/s11252-020-00972-w), 2020-03-12
Supplement: MOESM2 [file 17795050]

**Are cities hotspots for bees? Local and regional diversity patterns lead to different conclusions**

**Urban Ecosystems**

Weronika Banaszak-Cibicka<sup>1</sup>, Michał Żmihorski<sup>2,3</sup>

<sup>1</sup> Institute of Zoology, Poznań University of Life Sciences, Wojska Polskiego 71C, 60-625  
Poznań, Poland; Tel: +48/61/848-7637, Fax: +48/61/848-7632, e-mail:

banaszak@up.poznan.pl

<sup>2</sup> Mammal Research Institute, Polish Academy of Sciences, Stoczek 1, 17-230 Białowieża,  
Poland

<sup>3</sup> Institute of Nature Conservation, Polish Academy of Sciences, Mickiewicza 33, 31-120  
Kraków, Poland

Corresponding author: Weronika Banaszak-Cibicka, Institute of Zoology, Poznań University of Life Sciences, Wojska Polskiego 71C, 60-625 Poznań, Poland e-mail: banaszak@up.poznan.pl, tel: ++ 48 61 8487637

Table. Bee species occurring in three habitats along the urbanisation gradient in Poznań, Poland – 2014-2016.

| Family     | Species                                       | Abundance |          |       |       | Polish Red List status |
|------------|-----------------------------------------------|-----------|----------|-------|-------|------------------------|
|            |                                               | Urban     | Suburban | Rural | Total |                        |
| Colletidae | <i>Colletes cunicularius</i> (Linnaeus, 1761) | 1         | 0        | 15    | 16    |                        |
| Colletidae | <i>Colletes daviesanus</i> Smith, 1846        | 17        | 49       | 6     | 72    |                        |
| Colletidae | <i>Colletes fodiens</i> (Fourcroy, 1785)      | 4         | 0        | 5     | 9     |                        |
| Colletidae | <i>Colletes similis</i> Schenck, 1853         | 3         | 10       | 0     | 13    | DD                     |
| Colletidae | <i>Colletes succinctus</i> (Linnaeus, 1758)   | 1         | 2        | 1     | 4     |                        |
| Colletidae | <i>Hylaeus annularis</i> (Kirby, 1802)        | 2         | 5        | 0     | 7     |                        |
| Colletidae | <i>Hylaeus angustatus</i> (Schenck, 1859)     | 12        | 6        | 0     | 18    |                        |
| Colletidae | <i>Hylaeus bisinuatus</i> Förster, 1871       | 8         | 6        | 1     | 15    | DD                     |
| Colletidae | <i>Hylaeus brevicornis</i> Nylander, 1852     | 0         | 3        | 0     | 3     |                        |
| Colletidae | <i>Hylaeus communis</i> Nylander, 1852        | 7         | 11       | 5     | 23    |                        |
| Colletidae | <i>Hylaeus confusus</i> Nylander, 1852        | 1         | 0        | 0     | 1     |                        |
| Colletidae | <i>Hylaeus cornutus</i> Curtis, 1831          | 0         | 3        | 0     | 3     | DD                     |
| Colletidae | <i>Hylaeus difformis</i> (Eversmann, 1852)    | 1         | 0        | 0     | 1     |                        |
| Colletidae | <i>Hylaeus gibbus</i> Saunders, 1850          | 3         | 1        | 0     | 4     |                        |
| Colletidae | <i>Hylaeus gracilicornis</i> (Morawitz, 1867) | 0         | 0        | 1     | 1     | DD                     |
| Colletidae | <i>Hylaeus gredleri</i> Förster, 1871         | 2         | 0        | 0     | 2     | DD                     |
| Colletidae | <i>Hylaeus hyalinatus</i> Smith, 1842         | 14        | 18       | 0     | 32    |                        |
| Colletidae | <i>Hylaeus lepidulus</i> Cockerell, 1924      | 1         | 0        | 0     | 1     |                        |
| Colletidae | <i>Hylaeus pictipes</i> Nylander, 1852        | 1         | 0        | 0     | 1     | DD                     |
| Colletidae | <i>Hylaeus rinki</i> (Gorski, 1852)           | 0         | 0        | 1     | 1     | VU                     |
| Colletidae | <i>Hylaeus signatus</i> (Panzer, 1798)        | 0         | 2        | 0     | 2     | DD                     |
| Andrenidae | <i>Andrena apicata</i> Smith, 1847            | 0         | 0        | 1     | 1     |                        |
| Andrenidae | <i>Andrena barbilabris</i> (Kirby, 1802)      | 3         | 0        | 2     | 5     |                        |
| Andrenidae | <i>Andrena bicolor</i> fabricius, 1775        | 1         | 4        | 0     | 5     |                        |
| Andrenidae | <i>Andrena bimaculata</i> (Kirby, 1802)       | 1         | 0        | 3     | 4     | DD                     |
| Andrenidae | <i>Andrena carbonaria</i> Linnaeus, 1767      | 0         | 4        | 0     | 4     |                        |
| Andrenidae | <i>Andrena chrysoseles</i> (Kirby, 1802)      | 0         | 0        | 3     | 3     |                        |
| Andrenidae | <i>Andrena cineraria</i> (Linnaeus, 1758)     | 0         | 1        | 4     | 5     |                        |
| Andrenidae | <i>Andrena clarkella</i> (Kirby, 1802)        | 0         | 0        | 2     | 2     |                        |
| Andrenidae | <i>Andrena combinata</i> (Christ, 1791)       | 0         | 0        | 1     | 1     |                        |
| Andrenidae | <i>Andrena denticulata</i> (Kirby, 1802)      | 0         | 0        | 1     | 1     |                        |
| Andrenidae | <i>Andrena dorsata</i> (Kirby, 1802)          | 6         | 12       | 5     | 23    |                        |
| Andrenidae | <i>Andrena falsifica</i> Perkins, 1915        | 0         | 1        | 0     | 1     | VU                     |
| Andrenidae | <i>Andrena flavipes</i> Panzer, 1799          | 36        | 46       | 2     | 84    |                        |
| Andrenidae | <i>Andrena florea</i> Fabricius, 1793         | 0         | 4        | 0     | 4     | VU                     |
| Andrenidae | <i>Andrena fucata</i> Smith, 1847             | 0         | 0        | 6     | 6     |                        |
| Andrenidae | <i>Andrena fulva</i> (Müller, 1766)           | 17        | 16       | 26    | 59    |                        |
| Andrenidae | <i>Andrena fulvago</i> (Christ, 1791)         | 1         | 0        | 0     | 1     |                        |
| Andrenidae | <i>Andrena fuscipes</i> (Kirby, 1802)         | 2         | 0        | 0     | 2     |                        |
| Andrenidae | <i>Andrena gelriae</i> van der Vecht, 1927    | 0         | 0        | 1     | 1     |                        |
| Andrenidae | <i>Andrena gravida</i> Imhoff, 1899           | 8         | 4        | 12    | 24    |                        |
| Andrenidae | <i>Andrena haemorrhhoa</i> (Fabricius, 1781)  | 32        | 72       | 132   | 236   |                        |
| Andrenidae | <i>Andrena helvola</i> (Linnaeus, 1758)       | 2         | 5        | 37    | 44    |                        |

|            |                                                     |    |    |    |            |    |
|------------|-----------------------------------------------------|----|----|----|------------|----|
| Andrenidae | <i>Andrena humilis</i> Imhoff, 1832                 | 0  | 0  | 4  | <b>4</b>   |    |
| Andrenidae | <i>Andrena jacobii</i> Perkins, 1921                | 0  | 2  | 6  | <b>8</b>   |    |
| Andrenidae | <i>Andrena labiata</i> Fabricius, 1781              | 0  | 6  | 1  | <b>7</b>   |    |
| Andrenidae | <i>Andrena limata</i> Smith, 1853                   | 0  | 2  | 0  | <b>2</b>   | VU |
| Andrenidae | <i>Andrena minutula</i> (Kirby, 1802)               | 6  | 3  | 8  | <b>17</b>  |    |
| Andrenidae | <i>Andrena minutuloides</i> Perkins, 1914           | 2  | 3  | 1  | <b>6</b>   |    |
| Andrenidae | <i>Andrena nigroaenea</i> (Kirby, 1802)             | 14 | 1  | 6  | <b>21</b>  |    |
| Andrenidae | <i>Andrena nitida</i> (Müller, 1776)                | 21 | 6  | 11 | <b>38</b>  |    |
| Andrenidae | <i>Andrena pilipes</i> Fabricius, 1781              | 0  | 1  | 1  | <b>2</b>   |    |
| Andrenidae | <i>Andrena praecox</i> (Scopoli, 1763)              | 0  | 4  | 0  | <b>4</b>   |    |
| Andrenidae | <i>Andrena propinqua</i> Schenck, 1853              | 2  | 42 | 1  | <b>45</b>  |    |
| Andrenidae | <i>Andrena subopaca</i> Nylander, 1848              | 5  | 9  | 70 | <b>84</b>  |    |
| Andrenidae | <i>Andrena tibialis</i> (Kirby, 1802)               | 5  | 0  | 3  | <b>8</b>   |    |
| Andrenidae | <i>Andrena vaga</i> Panzer, 1799                    | 8  | 89 | 34 | <b>131</b> |    |
| Andrenidae | <i>Andrena varians</i> (Rossi, 1792)                | 1  | 0  | 0  | <b>1</b>   |    |
| Andrenidae | <i>Andrena ventralis</i> Imhoff, 1832               | 0  | 25 | 3  | <b>28</b>  |    |
| Andrenidae | <i>Andrena wilkella</i> (Kirby, 1802)               | 1  | 0  | 2  | <b>3</b>   |    |
| Andrenidae | <i>Panurgus calcaratus</i> (Scopoli, 1763)          | 8  | 15 | 18 | <b>41</b>  |    |
| Halictidae | <i>Dufourea minuta</i> Lapeletier, 1845             | 0  | 2  | 0  | <b>2</b>   | DD |
| Halictidae | <i>Evyllaesus aeratus</i> (Kirby, 1802)             | 0  | 0  | 2  | <b>2</b>   |    |
| Halictidae | <i>Evyllaesus albipes</i> (Fabricius, 1781)         | 16 | 44 | 6  | <b>66</b>  |    |
| Halictidae | <i>Evyllaesus brevicornis</i> (Schenck, 1863)       | 4  | 3  | 0  | <b>7</b>   | DD |
| Halictidae | <i>Evyllaesus calceatus</i> (Scopoli, 1763)         | 32 | 95 | 28 | <b>155</b> |    |
| Halictidae | <i>Evyllaesus fulvicornis</i> (Kirby, 1802)         | 1  | 0  | 1  | <b>2</b>   |    |
| Halictidae | <i>Evyllaesus laticeps</i> (Schenck, 1868)          | 24 | 10 | 1  | <b>35</b>  |    |
| Halictidae | <i>Evyllaesus leucopus</i> (Kirby, 1802)            | 0  | 2  | 1  | <b>3</b>   |    |
| Halictidae | <i>Evyllaesus linearis</i> (Schenck, 1869)          | 2  | 1  | 0  | <b>3</b>   |    |
| Halictidae | <i>Evyllaesus lucidulus</i> (Schenck, 1861)         | 5  | 5  | 0  | <b>10</b>  |    |
| Halictidae | <i>Evyllaesus minutissimus</i> (Kirby, 1802)        | 2  | 0  | 0  | <b>2</b>   |    |
| Halictidae | <i>Evyllaesus morio</i> (Fabricius, 1793)           | 55 | 66 | 0  | <b>121</b> |    |
| Halictidae | <i>Evyllaesus nitidulus</i> (Fabricius, 1804)       | 4  | 5  | 0  | <b>9</b>   |    |
| Halictidae | <i>Evyllaesus parvulus</i> (Schenck, 1853)          | 4  | 1  | 5  | <b>10</b>  |    |
| Halictidae | <i>Evyllaesus pauxillus</i> (Schenck, 1853)         | 92 | 9  | 27 | <b>128</b> |    |
| Halictidae | <i>Evyllaesus punctatissimus</i> (Schenck, 1853)    | 0  | 0  | 2  | <b>2</b>   |    |
| Halictidae | <i>Evyllaesus sexstrigatus</i> (Schenck, 1868)      | 9  | 16 | 15 | <b>40</b>  |    |
| Halictidae | <i>Evyllaesus villosulus</i> (Kirby, 1802)          | 1  | 3  | 24 | <b>28</b>  |    |
| Halictidae | <i>Halictus maculatus</i> (Smith, 1828)             | 0  | 1  | 0  | <b>1</b>   |    |
| Halictidae | <i>Halictus quadricinctus</i> (Fabricius, 1776)     | 0  | 1  | 1  | <b>2</b>   |    |
| Halictidae | <i>Halictus rubicundus</i> (Christ, 1791)           | 16 | 57 | 4  | <b>77</b>  |    |
| Halictidae | <i>Halictus sexcinctus</i> (Fabricius, 1775)        | 1  | 5  | 33 | <b>39</b>  |    |
| Halictidae | <i>Lasioglossum costulatum</i> (Kriechbaumer, 1873) | 0  | 0  | 1  | <b>1</b>   |    |
| Halictidae | <i>Lasioglossum laevigatum</i> (Kirby, 1802)        | 0  | 0  | 2  | <b>2</b>   |    |
| Halictidae | <i>Lasioglossum lativentre</i> (Schenck, 1853)      | 0  | 0  | 3  | <b>3</b>   |    |
| Halictidae | <i>Lasioglossum leucozonium</i> (Schrank, 1781)     | 2  | 3  | 34 | <b>39</b>  |    |
| Halictidae | <i>Lasioglossum majus</i> (Nylander, 1852)          | 0  | 0  | 4  | <b>4</b>   |    |
| Halictidae | <i>Lasioglossum quarinotatum</i> (Kirby, 1802)      | 0  | 0  | 1  | <b>1</b>   |    |
| Halictidae | <i>Lasioglossum sexnotatum</i> (Kirby, 1802)        | 9  | 24 | 11 | <b>44</b>  |    |
| Halictidae | <i>Lasioglossum subfasciatum</i> (Imhoff, 1832)     | 0  | 0  | 3  | <b>3</b>   |    |
| Halictidae | <i>Lasioglossum zonulum</i> (Smith, 1848)           | 0  | 0  | 2  | <b>2</b>   |    |

|              |                                                  |    |     |     |            |    |
|--------------|--------------------------------------------------|----|-----|-----|------------|----|
| Halictidae   | <i>Seladonia confusa</i> (Smith, 1853)           | 33 | 7   | 10  | <b>50</b>  |    |
| Halictidae   | <i>Seladonia leucahenea</i> (Ebmer, 1972)        | 0  | 3   | 2   | <b>5</b>   |    |
| Halictidae   | <i>Seladonia semitecta</i> (Morawitz, 1874)      | 0  | 1   | 0   | <b>1</b>   | DD |
| Halictidae   | <i>Seladonia subaurata</i> (Rossi, 1792)         | 49 | 56  | 8   | <b>113</b> |    |
| Halictidae   | <i>Seladonia tumulorum</i> (Linnaeus, 1758)      | 41 | 23  | 28  | <b>92</b>  |    |
| Halictidae   | <i>Sphecodes albilabris</i> (Fabricius, 1793)    | 0  | 6   | 6   | <b>12</b>  |    |
| Halictidae   | <i>Sphecodes crassus</i> Thomson, 1870           | 5  | 0   | 0   | <b>5</b>   |    |
| Halictidae   | <i>Sphecodes ephippius</i> (Linnaeus, 1767)      | 0  | 2   | 4   | <b>6</b>   |    |
| Halictidae   | <i>Sphecodes gibbus</i> (Linnaeus, 1758)         | 1  | 2   | 9   | <b>12</b>  |    |
| Halictidae   | <i>Sphecodes longulus</i> Hagens, 1882           | 0  | 1   | 0   | <b>1</b>   |    |
| Halictidae   | <i>Sphecodes puncticeps</i> Thomson, 1870        | 0  | 1   | 0   | <b>1</b>   |    |
| Melittidae   | <i>Dasypoda hirtipes</i> (Harris, 1780)          | 20 | 114 | 169 | <b>303</b> |    |
| Melittidae   | <i>Macropis europaea</i> Warncke, 1973           | 0  | 1   | 0   | <b>1</b>   |    |
| Melittidae   | <i>Melitta leporina</i> (Panzer, 1799)           | 27 | 5   | 3   | <b>35</b>  |    |
| Megachilidae | <i>Anthidiellum strigatum</i> (Panzer, 1805)     | 0  | 0   | 2   | <b>2</b>   |    |
| Megachilidae | <i>Anthidium manicatum</i> (Fabricius, 1775)     | 0  | 10  | 1   | <b>11</b>  |    |
| Megachilidae | <i>Anthocopa papaveris</i> (Latreille, 1799)     | 0  | 0   | 3   | <b>3</b>   | VU |
| Megachilidae | <i>Anthocopa spinulosa</i> (Kirby, 1802)         | 0  | 2   | 1   | <b>3</b>   |    |
| Megachilidae | <i>Chalicodoma ericetorum</i> (Lepeletier, 1841) | 1  | 11  | 1   | <b>13</b>  |    |
| Megachilidae | <i>Chelostoma florissomme</i> (Linnaeus, 1758)   | 0  | 0   | 4   | <b>4</b>   |    |
| Megachilidae | <i>Chelostoma rapunculi</i> (Lepeletier, 1841)   | 0  | 18  | 0   | <b>18</b>  |    |
| Megachilidae | <i>Coelioxys alata</i> (Förster, 1853)           | 0  | 1   | 0   | <b>1</b>   | DD |
| Megachilidae | <i>Coelioxys conoidea</i> (Illiger, 1806)        | 0  | 4   | 1   | <b>5</b>   |    |
| Megachilidae | <i>Coelioxys quadridentata</i> (Linnaeus, 1758)  | 2  | 0   | 1   | <b>3</b>   |    |
| Megachilidae | <i>Heriades crenulatus</i> Nylander, 1856        | 1  | 5   | 6   | <b>12</b>  |    |
| Megachilidae | <i>Heriades truncorum</i> (Linnaeus, 1758)       | 3  | 51  | 5   | <b>59</b>  |    |
| Megachilidae | <i>Hoplitis adunca</i> (Panzer, 1798)            | 7  | 16  | 13  | <b>36</b>  |    |
| Megachilidae | <i>Hoplitis anthocopoides</i> (Schenck, 1853)    | 0  | 0   | 1   | <b>1</b>   |    |
| Megachilidae | <i>Hoplitis leucomelena</i> (Kirby, 1802)        | 2  | 2   | 1   | <b>5</b>   |    |
| Megachilidae | <i>Megachile centuncularis</i> (Linnaeus, 1758)  | 0  | 0   | 1   | <b>1</b>   |    |
| Megachilidae | <i>Megachile circumcincta</i> (Kirby, 1802)      | 0  | 4   | 11  | <b>15</b>  |    |
| Megachilidae | <i>Megachile lagopoda</i> (Linnaeus, 1761)       | 0  | 3   | 0   | <b>3</b>   |    |
| Megachilidae | <i>Megachile ligniseca</i> (Kirby, 1802)         | 1  | 2   | 3   | <b>6</b>   |    |
| Megachilidae | <i>Megachile nigriventris</i> Schenck, 1868      | 2  | 4   | 1   | <b>7</b>   | LC |
| Megachilidae | <i>Megachile rotundata</i> (Fabricius, 1784)     | 2  | 4   | 0   | <b>6</b>   |    |
| Megachilidae | <i>Megachile versicolor</i> Smith, 1844          | 1  | 2   | 3   | <b>6</b>   |    |
| Megachilidae | <i>Megachile willughbiella</i> (Kirby, 1802)     | 3  | 21  | 4   | <b>28</b>  |    |
| Megachilidae | <i>Osmia aurulenta</i> (Panzer, 1799)            | 0  | 12  | 1   | <b>13</b>  |    |
| Megachilidae | <i>Osmia brevicornis</i> (Fabricius, 1798)       | 0  | 1   | 0   | <b>1</b>   |    |
| Megachilidae | <i>Osmia caerulescens</i> (Linnaeus, 1758)       | 1  | 16  | 1   | <b>18</b>  |    |
| Megachilidae | <i>Osmia mustelina</i> Gerstaecker, 1869         | 0  | 3   | 1   | <b>4</b>   |    |
| Megachilidae | <i>Osmia rufa</i> (Linnaeus, 1758)               | 28 | 65  | 4   | <b>97</b>  |    |
| Megachilidae | <i>Proanthidium oblongatum</i> Latreille, 1809   | 0  | 1   | 1   | <b>2</b>   | VU |
| Megachilidae | <i>Stelis breviscula</i> (Nylander, 1848)        | 1  | 0   | 1   | <b>2</b>   |    |
| Megachilidae | <i>Stelis punctulatissima</i> (Kirby, 1802)      | 0  | 1   | 0   | <b>1</b>   |    |
| Apidae       | <i>Anthophora bimaculata</i> (Panzer, 1798)      | 0  | 5   | 12  | <b>17</b>  |    |
| Apidae       | <i>Anthophora furcata</i> (Panzer, 1798)         | 0  | 3   | 0   | <b>3</b>   |    |
| Apidae       | <i>Anthophora plumipes</i> (Pallas, 1772)        | 75 | 110 | 37  | <b>222</b> |    |
| Apidae       | <i>Anthophora quadrimaculata</i> (Panzer, 1806)  | 4  | 10  | 0   | <b>14</b>  |    |

|        |                                                  |     |     |     |             |    |
|--------|--------------------------------------------------|-----|-----|-----|-------------|----|
| Apidae | <i>Anthophora retusa</i> (Linnaeus, 1758)        | 0   | 0   | 1   | <b>1</b>    |    |
| Apidae | <i>Apis mellifera</i> Linnaeus, 1758             | 508 | 402 | 247 | <b>1157</b> |    |
| Apidae | <i>Bombus bohemicus</i> (Seidl, 1838)            | 0   | 2   | 9   | <b>11</b>   |    |
| Apidae | <i>Bombus hortorum</i> (Linnaeus, 1761)          | 16  | 13  | 7   | <b>36</b>   |    |
| Apidae | <i>Bombus hypnorum</i> (Linnaeus, 1758)          | 27  | 15  | 3   | <b>45</b>   |    |
| Apidae | <i>Bombus jonellus</i> (Kirby, 1802)             | 3   | 0   | 0   | <b>3</b>    | VU |
| Apidae | <i>Bombus lapidarius</i> (Linnaeus, 1758)        | 272 | 220 | 99  | <b>591</b>  |    |
| Apidae | <i>Bombus pascuorum</i> (Scopoli, 1763)          | 441 | 291 | 180 | <b>912</b>  |    |
| Apidae | <i>Bombus pratorum</i> (Linnaeus, 1761)          | 2   | 30  | 20  | <b>52</b>   |    |
| Apidae | <i>Bombus ruderarius</i> (Muller, 1776)          | 11  | 17  | 7   | <b>35</b>   |    |
| Apidae | <i>Bombus rupestris</i> (Fabricius 1793)         | 0   | 0   | 7   | <b>7</b>    |    |
| Apidae | <i>Bombus</i> s. str. ( <i>Terrestribombus</i> ) | 226 | 178 | 137 | <b>541</b>  |    |
| Apidae | <i>Bombus sylvarum</i> (Linnaeus, 1761)          | 2   | 3   | 5   | <b>10</b>   |    |
| Apidae | <i>Bombus sylvestris</i> (Lepeletier 1832)       | 1   | 1   | 1   | <b>3</b>    |    |
| Apidae | <i>Bombus vestalis</i> (Fourcroy, 1785)          | 0   | 0   | 1   | <b>1</b>    |    |
| Apidae | <i>Bombus veteranus</i> (Fabricius, 1793)        | 8   | 5   | 6   | <b>19</b>   | VU |
| Apidae | <i>Ceratina cyanea</i> (Kirby, 1802)             | 0   | 5   | 5   | <b>10</b>   |    |
| Apidae | <i>Epeolus variegatus</i> (Linnaeus, 1758)       | 0   | 2   | 3   | <b>5</b>    |    |
| Apidae | <i>Eucera longicornis</i> (Linnaeus, 1758)       | 0   | 1   | 0   | <b>1</b>    |    |
| Apidae | <i>Melecta punctata</i> (Fabricius, 1775)        | 2   | 6   | 3   | <b>11</b>   |    |
| Apidae | <i>Nomada alboguttata</i> Herrich-Schäffer, 1839 | 0   | 1   | 0   | <b>1</b>    |    |
| Apidae | <i>Nomada bifasciata</i> Olivier, 1811           | 1   | 0   | 0   | <b>1</b>    | DD |
| Apidae | <i>Nomada bifida</i> Thomson, 1872               | 0   | 0   | 9   | <b>9</b>    |    |
| Apidae | <i>Nomada femoralis</i> Morawitz, 1869           | 0   | 0   | 1   | <b>1</b>    |    |
| Apidae | <i>Nomada flavoguttata</i> (Kirby, 1802)         | 0   | 0   | 12  | <b>12</b>   |    |
| Apidae | <i>Nomada flavopicta</i> (Kirby, 1802)           | 1   | 2   | 0   | <b>3</b>    |    |
| Apidae | <i>Nomada fulvicornis</i> Fabricius, 1793        | 0   | 0   | 4   | <b>4</b>    |    |
| Apidae | <i>Nomada fuscicornis</i> Nylander, 1848         | 0   | 0   | 1   | <b>1</b>    |    |
| Apidae | <i>Nomada lathburiana</i> (Kirby, 1802)          | 0   | 0   | 8   | <b>8</b>    |    |
| Apidae | <i>Nomada marshamella</i> (Kirby, 1802)          | 0   | 0   | 3   | <b>3</b>    |    |
| Apidae | <i>Nomada moeschleri</i> Alfken, 1913            | 1   | 9   | 10  | <b>20</b>   | LC |
| Apidae | <i>Nomada rufipes</i> Fabricius 1793             | 0   | 0   | 1   | <b>1</b>    |    |
| Apidae | <i>Nomada signata</i> Jurine, 1807               | 1   | 0   | 3   | <b>4</b>    |    |
| Apidae | <i>Nomada striata</i> Fabricius, 1793            | 0   | 0   | 1   | <b>1</b>    |    |
| Apidae | <i>Nomada zonata</i> Panzer, 1798                | 0   | 0   | 2   | <b>2</b>    | LC |

VU – vulnerable, DD – data deficient , LC – least concern
